# Supplementary material for: Non-invasive ventilation in the palliative care of patients with chronic obstructive pulmonary disease: a scoping review protocol
Source: HighWire-hosted journal article supplement (doi:10.1136/bmjopen-2020-048344), 2021-12-01
Supplement: bmjopen-2020-048344supp001_data_supplement.pdf [file bmjopen-2020-048344supp001_data_supplement.pdf]

**Online supplemental material 1** The final search strategy in MEDLINE

| Search | MeSH terms, text words and combinations                                                                                                                             |
|--------|---------------------------------------------------------------------------------------------------------------------------------------------------------------------|
| 1      | Palliative Care/                                                                                                                                                    |
| 2      | "Hospice and Palliative Care Nursing"/                                                                                                                              |
| 3      | exp Terminal Care/                                                                                                                                                  |
| 4      | Palliative Medicine/                                                                                                                                                |
| 5      | exp Advance Care Planning/                                                                                                                                          |
| 6      | "Right to Die"/                                                                                                                                                     |
| 7      | Terminally ill/                                                                                                                                                     |
| 8      | Resuscitation Orders/                                                                                                                                               |
| 9      | (palliative or palliate* or palliating).tw,kf.                                                                                                                      |
| 10     | (dying or (right adj2 die) or (die adj2 dignity)).tw,kf.                                                                                                            |
| 11     | "supporti* care".tw,kf.                                                                                                                                             |
| 12     | ((terminal* or "end stage*" or "advanced stage*" or "late stage*") adj3 (disease* or ill* or care* or caring or treatment* or period* or nurs* or patient*)).tw,kf. |
| 13     | (eol or "end of life").tw,kf.                                                                                                                                       |
| 14     | ((("life limiting" or "life threatening") adj3 (disease* or condition* or illness*)).tw,kf.                                                                         |
| 15     | ((("do not" adj3 (intubat* or resuscitat*)) or DNR or DNAR or DNI).tw,kf.                                                                                           |
| 16     | "comfort measure*".tw,kf.                                                                                                                                           |
| 17     | (advance*1 adj3 (plan*1 or planning or directive*)).tw,kf.                                                                                                          |
| 18     | hospice*.tw,kf.                                                                                                                                                     |
| 19     | or/1-18                                                                                                                                                             |
| 20     | exp Pulmonary Disease, Chronic Obstructive/                                                                                                                         |
| 21     | alpha 1-Antitrypsin Deficiency/                                                                                                                                     |
| 22     | (COPD or COAD or COBD or AECEB).tw,kf.                                                                                                                              |
| 23     | ((chronic or "long-term" or longterm or lifelong or "life-long" or permanent or persisting) adj3 (pulmonary or lung*1 or airway* or airflow*)).tw,kf.               |
| 24     | ((chronic or "long-term" or longterm or lifelong or "life-long" or permanent or persisting) adj3 (Bronchitis or bronchitides)).tw,kf.                               |
| 25     | ((pulmonary or focal or panacinar or panlobular) adj3 emphysema*).tw,kf.                                                                                            |
| 26     | (antitrypsin adj3 deficienc*).tw,kf.                                                                                                                                |
| 27     | or/20-26                                                                                                                                                            |

|    |                                                                                     |
|----|-------------------------------------------------------------------------------------|
| 28 | Noninvasive Ventilation/                                                            |
| 29 | Respiration, Artificial/                                                            |
| 30 | exp Positive-Pressure Respiration/                                                  |
| 31 | exp Ventilators, Mechanical/                                                        |
| 32 | (NIV or ((non-invasive or noninvasive) adj3 ventilat*)).tw,kf.                      |
| 33 | (CPAP or BIPAP or BPAP or NIPPV or NPPV or NCPAP).tw,kf.                            |
| 34 | (nasal adj2 ventilat*).tw,kf.                                                       |
| 35 | ((mechanical or pulmonary) adj2 ventilator*).tw,kf.                                 |
| 36 | (positive adj3 (airway* adj3 pressure)).tw,kf.                                      |
| 37 | (positive adj3 (pressure adj3 (ventilation* or respiration* or expiratory))).tw,kf. |
| 38 | or/28-37                                                                            |
| 39 | 19 and 27 and 38                                                                    |
| 40 | limit 39 to (comment or editorial or letter)                                        |
| 41 | 39 not 40                                                                           |
| 42 | limit 41 to (danish or english or german or norwegian or spanish or swedish)        |
